# Supplementary material
Source: PubMed Central journal article supplement (PMC1502281)

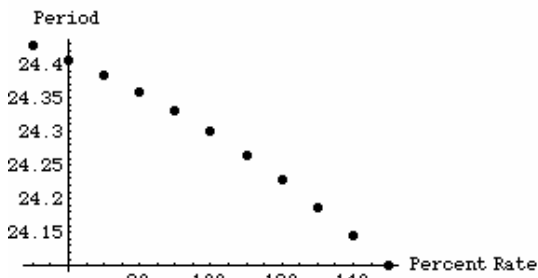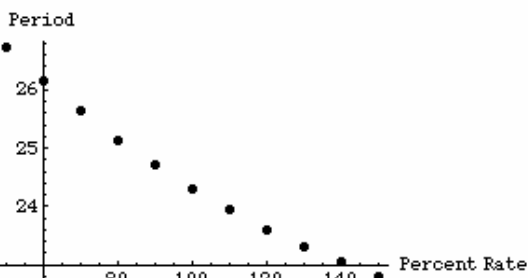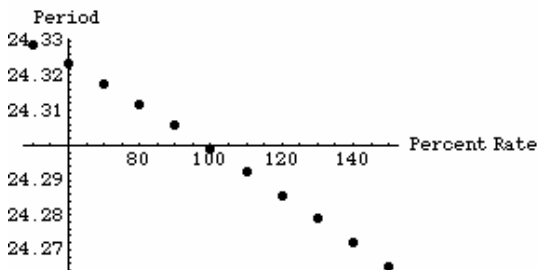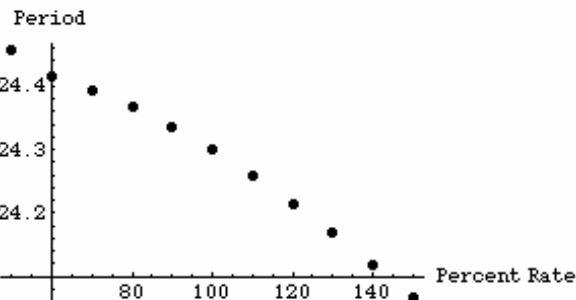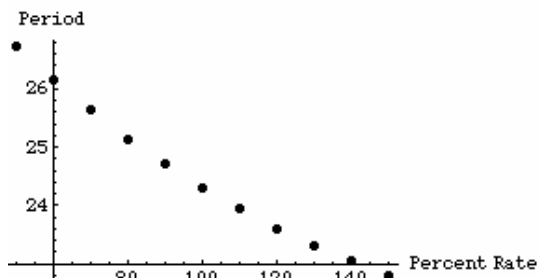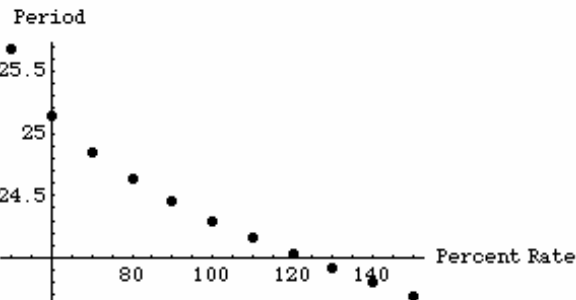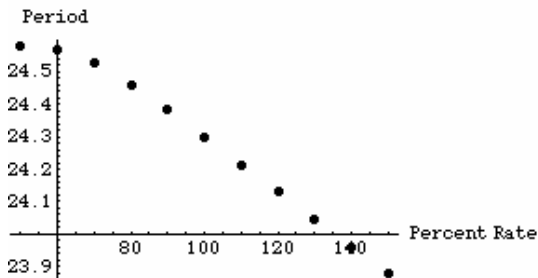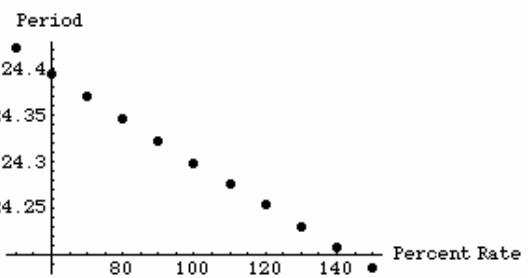

Supplement: pnas_0604511103_1.pdf [file pnas_0604511103_1.pdf]

**A**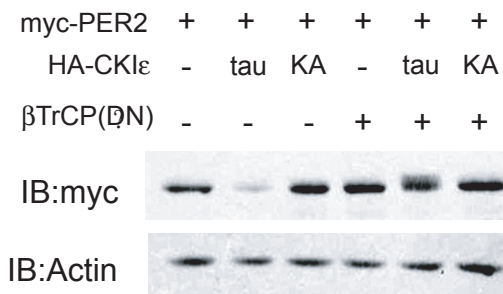**B**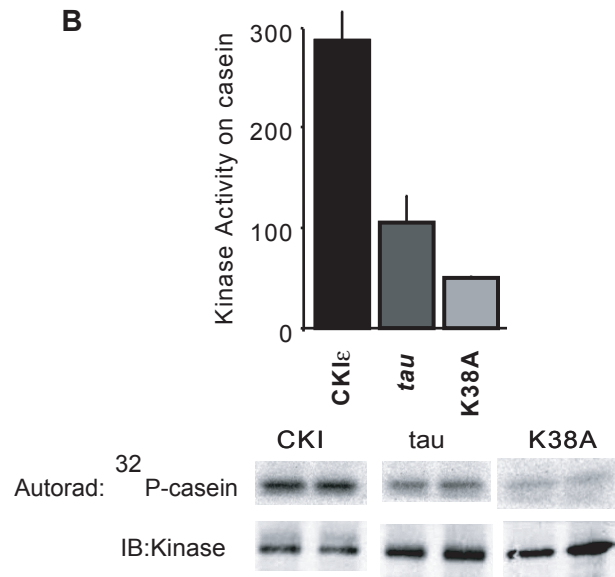**C**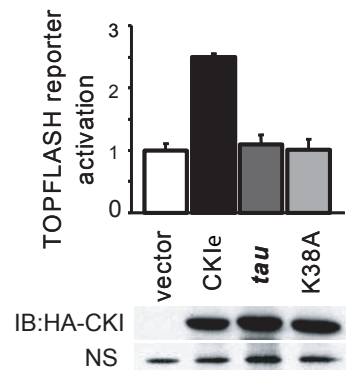**D**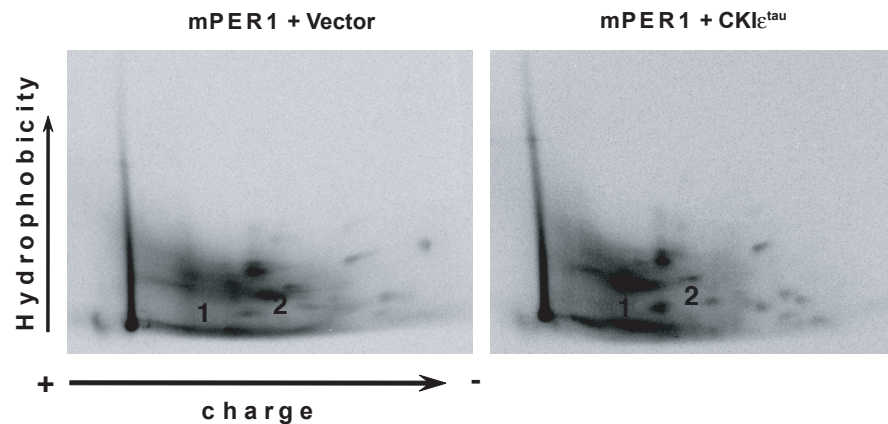

Supplement: pnas_0604511103_2.pdf [file pnas_0604511103_2.pdf]
